# Supplementary material for: Steroid biotransformations in biphasic systems with Yarrowia lipolytica expressing human liver cytochrome P450 genes
Source: PubMed Central journal article supplement (PMC3544689; doi:10.1186/1475-2859-11-106), 2012-08-09
Supplement: 1475-2859-11-106-S1.pdf [file 1475-2859-11-106-S1.pdf]

### Influence of growth phase on whole-cell conversion rates.

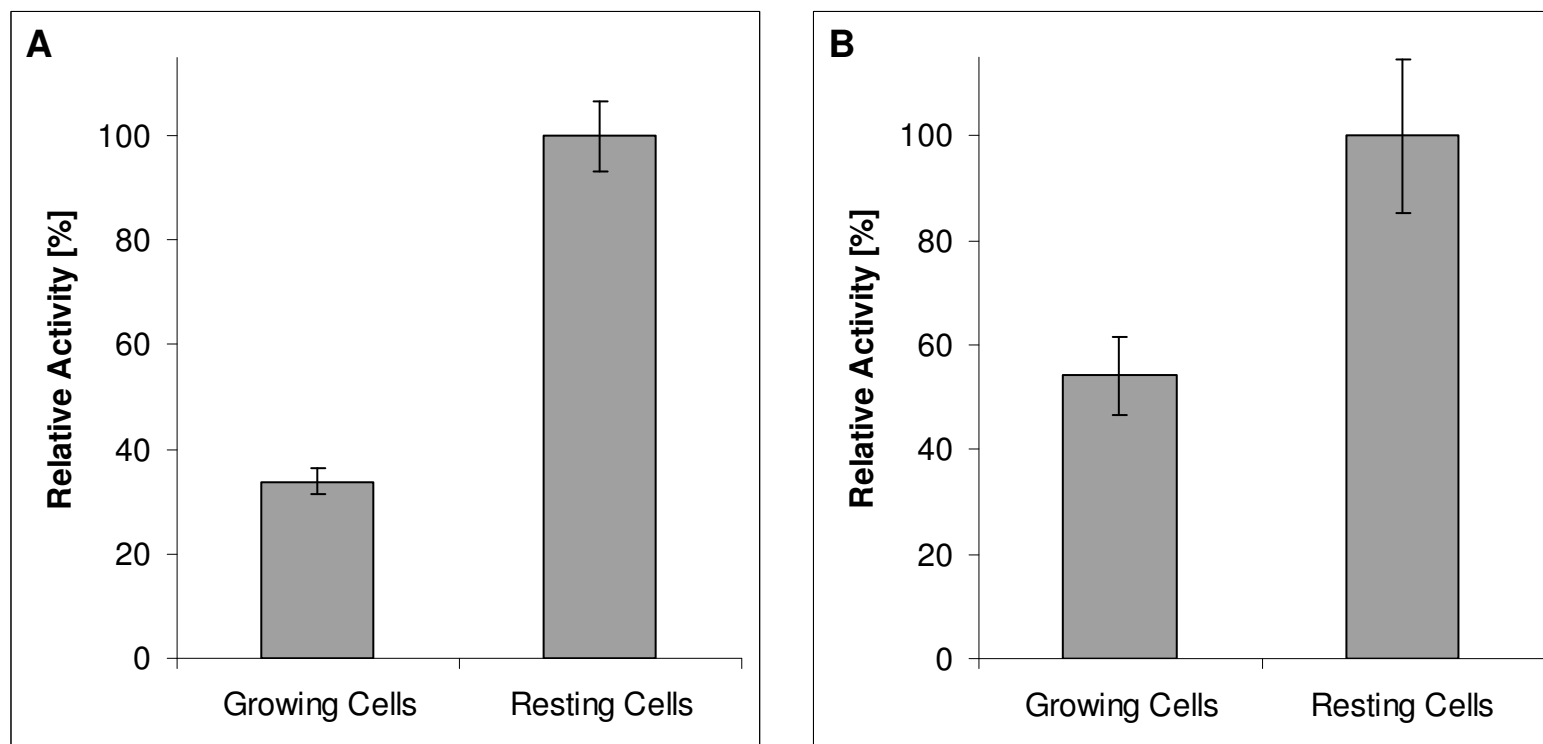

Whole-cell conversions in aqueous systems by growing and resting cells of *Y. lipolytica* YL21 harboring CYP2D6 and hCPR (A) and YL22 harboring CYP3A4 and hCPR (B), after 26 h of ethanol induction was quantified in triplicate. Incubation time 15-60 min for bufuralol (A) or 30-120 min for progesterone (B) and cell concentrations of 10g/l were used. Activity was determined as product formation rate measuring either hydroxybufuralol or hydroxyprogesterone concentrations.
