# Supplementary material for: Steroid biotransformations in biphasic systems with Yarrowia lipolytica expressing human liver cytochrome P450 genes
Source: PubMed Central journal article supplement (PMC3544689; doi:10.1186/1475-2859-11-106), 2012-08-09
Supplement: 1475-2859-11-106-S2.pdf [file 1475-2859-11-106-S2.pdf]

## Solubility of progesterone in organic solvents

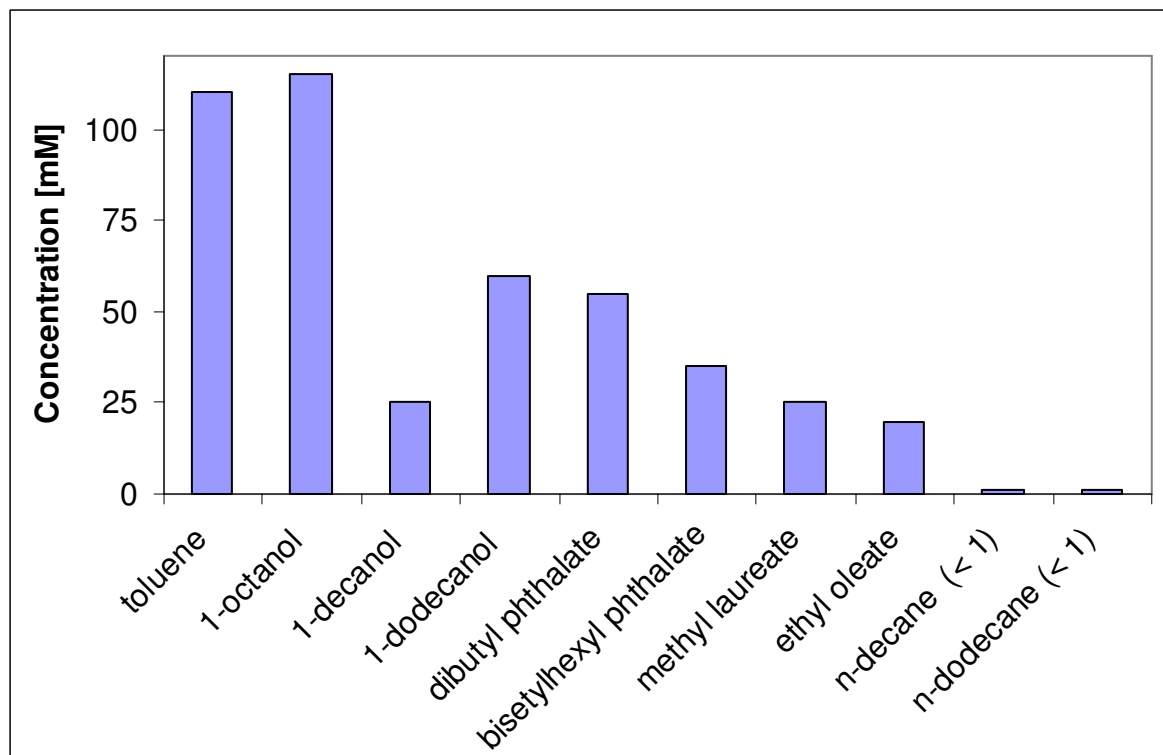

Solubility of progesterone in different organic solvents determined by gradually adding solvents to a certain amount of progesterone till complete dissolution was obtained.
